# Supplementary material for: Shuttling of Peptide‐Drug Conjugates by G Protein‐Coupled Receptors Is Significantly Improved by Pulsed Application
Source: PubMed Central journal article supplement — ChemMedChem. 2020 Sep 3;16(1):164–78. doi: 10.1002/cmdc.202000490 (PMC7818256; doi:10.1002/cmdc.202000490), 2020-09-03
Supplement: CMDC-16-164-s001.pdf [file CMDC-16-164-s001.pdf]

# ChemMedChem

Supporting Information

## **Shuttling of Peptide-Drug Conjugates by G Protein-Coupled Receptors Is Significantly Improved by Pulsed Application**

Isabelle Ziffert, Anette Kaiser, Paul Hoppenz, Karin Mörl, and Annette G. Beck-Sickinger\*

## Supporting Information

### Table of Content:

- I. Experimental Details
  - i.) Primer Design
  - ii.) Semi-quantitative RT-PCR
  - iii.) Ca<sup>2+</sup> assay
- II. Supplementary Figure S.1

### I. Experimental Details:

#### i.) Primer

**Table 1: designed primers and details of the RT-PCR analysis of murine mHypoE-N39 cells.**

| encoded<br>Protein |    | Sequence [5'-3']               | T <sub>a</sub><br>[°C] | Product<br>length [bp] |
|--------------------|----|--------------------------------|------------------------|------------------------|
| mY <sub>1</sub> R  | s  | CCTCTCCTTCTCAGACTTGC           | 60                     | 775                    |
|                    | as | GTCACAAAAGTTGAAGAAGAACTGC      | 60                     |                        |
| mY <sub>2</sub> R  | s  | AAGAGCATGCGCACAGTAACCAAC       | 60                     | 236                    |
|                    | as | TGGGCCAGGTGGTAGACAATGGGGCAACGA | 60                     |                        |
| mY <sub>4</sub> R  | s  | GACTTGCTACCCATCCTCAT           | 54                     | 492                    |
|                    | as | ATCACCACCGTCTCATCTA            | 54                     |                        |
| mY <sub>5</sub> R  | s  | TCTGATTCATACAGAATTGC           | 54                     | 653                    |
|                    | as | GGATTAAGACAACAGGACATC          | 54                     |                        |
| GAPDH              | s  | ACCACAGTCCATGCCATCAC           | 60                     | 452                    |
|                    | as | TCCACCACCCTGTTGCTGTA           | 60                     |                        |

T<sub>a</sub> = annealing temperature; s = sense; as = antisense, m = murine; bp = base pairs

**ii.) Semi-quantitative RT-PCR.** mHypoE-N39 cells were cultured to confluence as previously described, washed twice with PBS, harvested by trypsination and suspended in 10 ml fresh medium. The cell suspension was centrifuged for 5 min at 800 rpm, the supernatant was discarded and the cell pellet was frozen in liquid nitrogen and stored at -70 °C until RNA isolation was performed.

RNA extraction was accomplished using RNeasy Mini Kit (Qiagen) following an additional DNase I digestion step according to the manufacturer's protocol. RNA amount was determined photometrically using a microplate reader (Infinite 200 PRO NanoQuant, Tecan). Reverse transcription by QuantiNova™ Reverse Transcription Kit was performed in a total volume of 20 µl composed of 1 µg RNA, 2 µg oligo(dT)<sub>12-18</sub> primers, 4 µl buffer, 2 µl 0.1 mol/L dithiothreitol, 0.5 µl dNTP-mix (10 µM), 0.5 µl RNaseOUT™ Recombinant Ribonuclease Inhibitor and 160 units of SuperScript®II Reverse Transcriptase. For cDNA negative control water was added instead of the enzyme.

RT-PCR reaction was performed in a total volume of 25 µl using 2 µl of generated cDNA; 100 pmol/µl of specific primer (forward and reverse, Table 1); 2.5 µl 10x Taq-buffer; 1.5 µl 25 mM MgCl<sub>2</sub>; 0.5 µl dNTP mix; 1 µl DMSO and 0.25 units of Taq DNA-polymerase(0.25 µl). For primer control water was added instead of cDNA. PCR protocol was applied according to the following protocol: 5 min initial denaturation at 95 °C, 35 cycles of denaturation at 95 °C for 30 s, annealing step for 30 s at different temperatures and extension at 72 °C for 90 s; followed by final extension step for 10 min at 72 °C. Analysis of PCR products was performed by electrophoresis on 1 % agarose gel supplemented with ethidium bromide and images were taken using a transilluminator (DarkHood SH-40/50, Biostep).

**iii.) Ca<sup>2+</sup> assay.** mHypoE-N39 cells were cultured in 25 cm<sup>2</sup> up to 70-80% confluence in a humidified atmosphere at 37 °C and 5% CO<sub>2</sub>. Transfection of 4000 ng plasmid encoding the Gα<sub>Δ6qi4myr</sub> protein was performed by using Metafecten® Pro (Biontex Laboratories GmbH)

according to the manufacturer's protocol. One-day post transfection, cells were re-seeded (10.000 cells/well) into a black poly-D-lysine coated 96-well plates (Greiner Bio-one) and incubated overnight at 37 °C. Two-days post transfection  $\text{Ca}^{2+}$  experiments were performed with the help of the FLIPR® Calcium Assay Kit (Molecular Devices). Cells were stained with 1.0  $\mu\text{M}$  Fluor-2-AM staining dye. For measurement, a subset of respective stimulated cells was treated with NPY,  $[\text{F}^7, \text{P}^{34}]$ -NPY, hPP,  $[\text{AHX}^{5-24}]$ -NPY and  $[\text{A}^{31}, \text{Aib}^{32}]$ -NPY in a concentration range  $10^{-11}$  M to  $10^{-6}$  M and the  $\text{Ca}^{2+}$ -response was detected using the FlexStation (Molecular Devices). For antagonist experiments, cells were treated with 100 nM HU404 (kindly provided by A. Buschauer, University of Regensburg, Germany) and incubated for 30 min prior to agonist stimulation.

## II Supplementary Figure 1

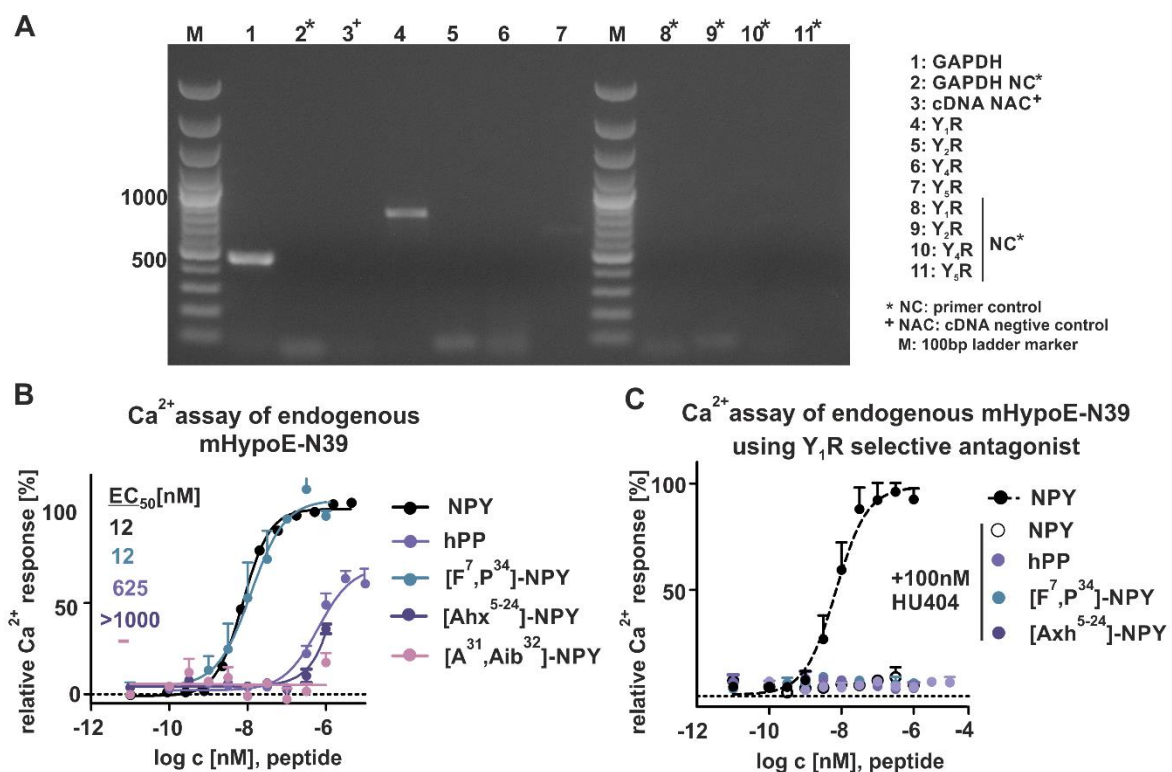

**Supplementary Figure S.1. Endogenous  $\text{Y}_1$  receptor expression was confirmed by RT-PCR and  $\text{Ca}^{2+}$  assay.** A) mRNA expression level of mHypoE-N39 cells examined by RT-PCR and detected by 1% Agarose-Gel (1x TAE-buffer, stained with 0.5  $\mu\text{g}/\text{ml}$  ethidium bromide). GAPDH expression was

used as a positive control. cDNA negative control (no amplification control, NAC) confirmed the absence of genomic DNA. A negative control without cDNA (NC) of each construct excluded contamination and primer oligomerization. One clear band was detected and matched with the Y<sub>1</sub>R and an additional weak band for Y<sub>5</sub>R was observed. **B)** Data were verified with the Ca<sup>2+</sup>flux assay by testing selective peptide agonists for Y<sub>1</sub>R (F<sup>7</sup>,P<sup>34</sup>-NPY), Y<sub>2</sub>R (AHX<sup>5-24</sup>-NPY) Y<sub>4</sub>R (hPP,) and Y<sub>5</sub>R (A<sup>31</sup>,Aib<sup>32</sup>-NPY). Only stimulation with NPY and F<sup>7</sup>,P<sup>34</sup>-NPY resulted in a robust Ca<sup>2+</sup>response, whereas PP (selective for Y<sub>4</sub>R), Ahx<sup>5-24</sup>-NPY (Y<sub>2</sub>R) and A<sup>31</sup>, Aib<sup>32</sup>-NPY (Y<sub>5</sub>R) provoked no response even at high concentration. **C)** Data were confirmed by using a Y<sub>1</sub>R-specific antagonist HU404 (30 min prior agonist stimulation, 100 nM). Signal transduction was completely suppressed by incubating the cells with HU404 30 min prior to agonist stimulation compared to the control curve without an antagonist. Experiments represent data n≥3.
